# Supplementary material
Source: publisher figshare collection journal article supplement (https://sage.figshare.com/ndownloader/files/18091022)

## Appendix

The normal quantile-quantile (Q-Q) plot is an exploratory graphical approach used to check the validity of the assumption that the data set is normally distributed. The basic idea is to compute the theoretically expected value for each data point based on the hypothesised normal distribution. The normal Q-Q plots of different data sets used in the statistical analyses are shown below. The solid line represents a perfect fit to a normal distribution. The normal Q-Q plots allow for easy identification of departures from normality, especially of kurtosis (heavy tails) and skewness in the distribution. Tables 2 and 4 provide the exact statistics for both kurtosis and skewness.

### Q-Q plots for gauge length

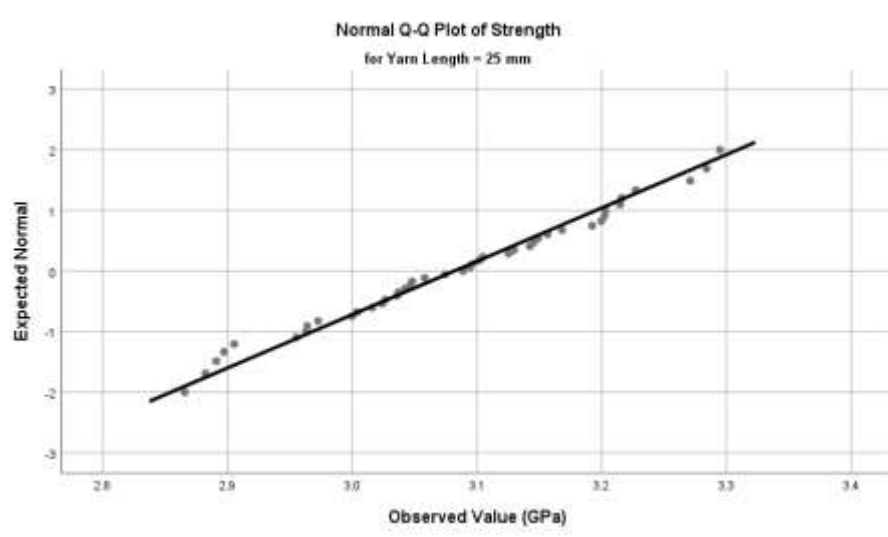

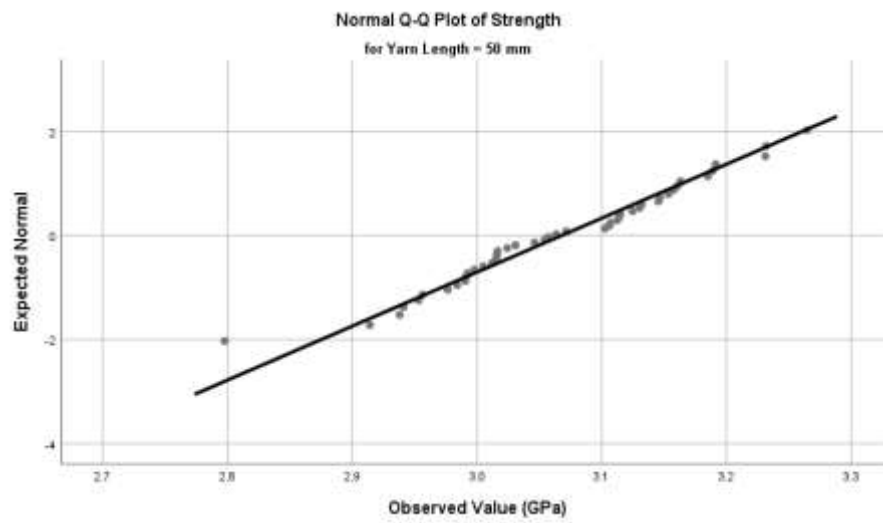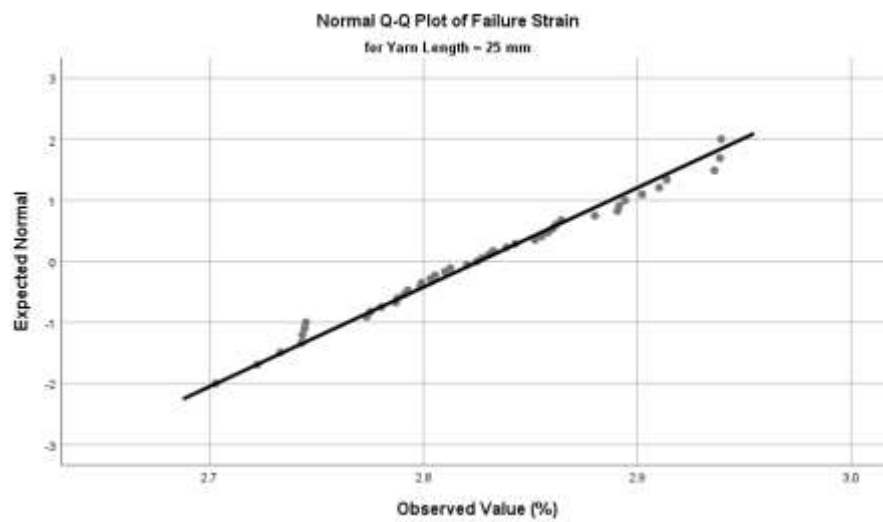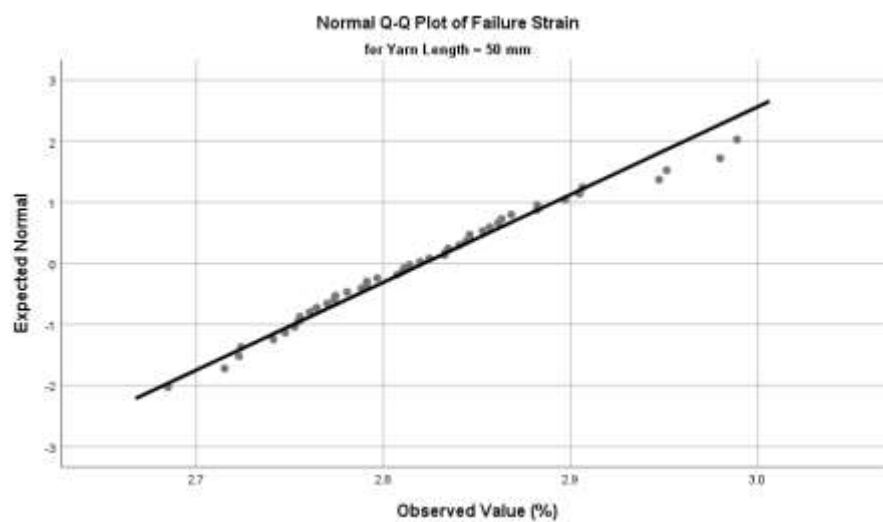

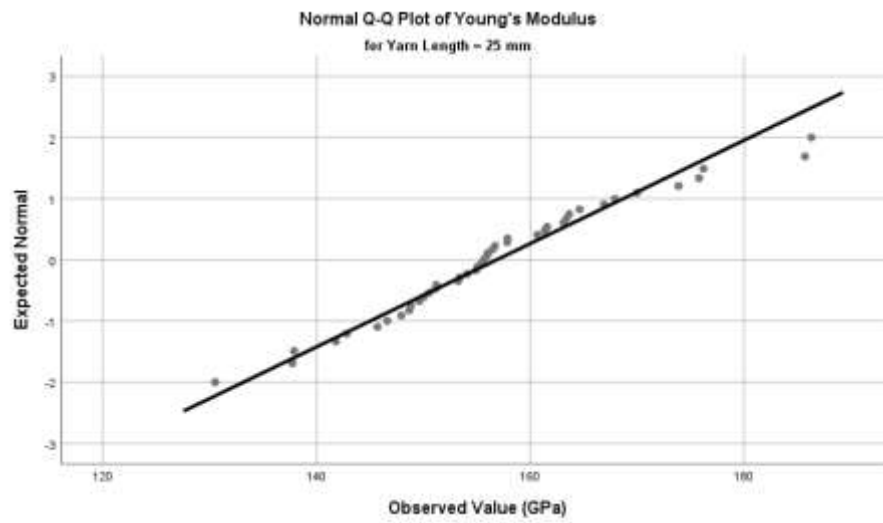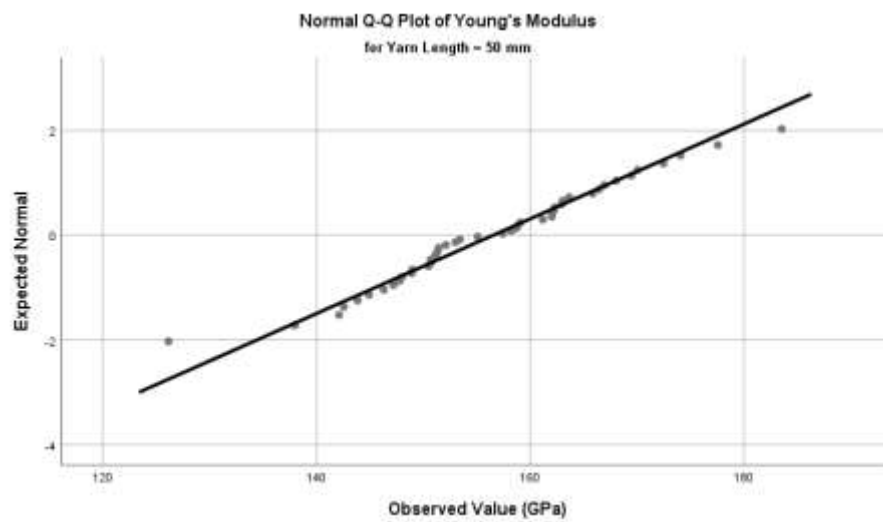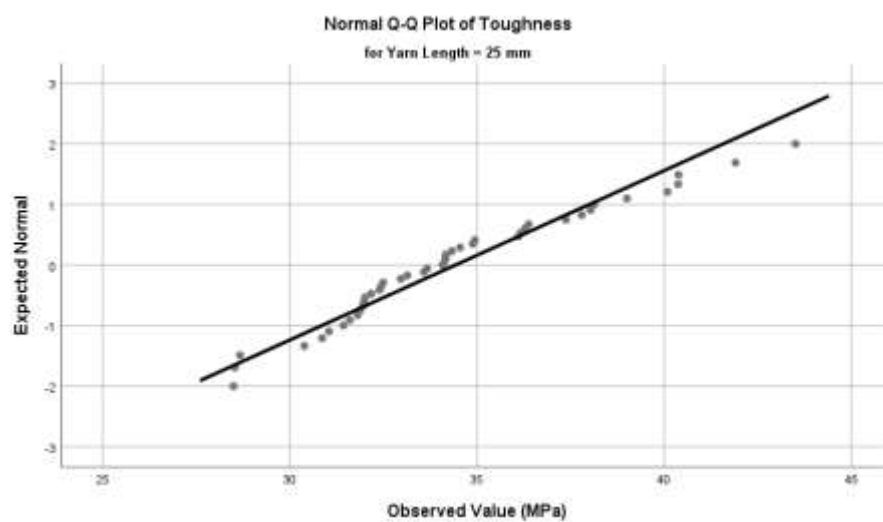

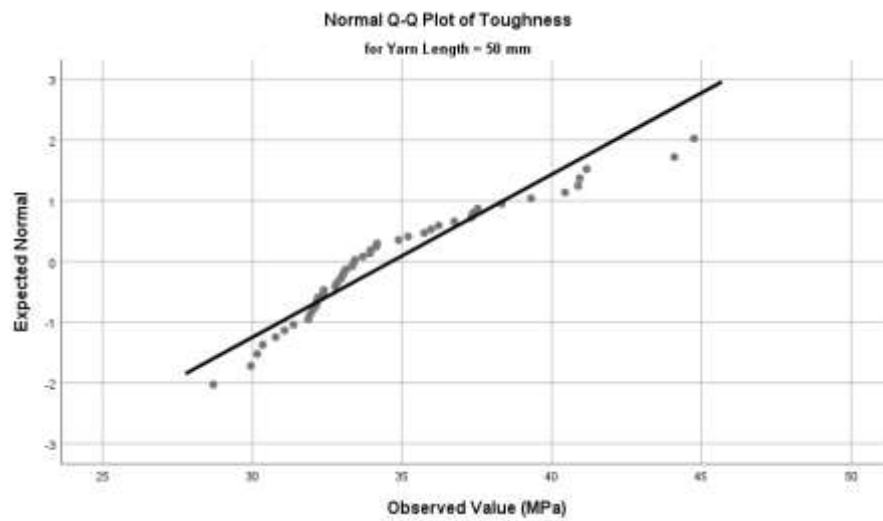

### Q-Q plots for yarn type

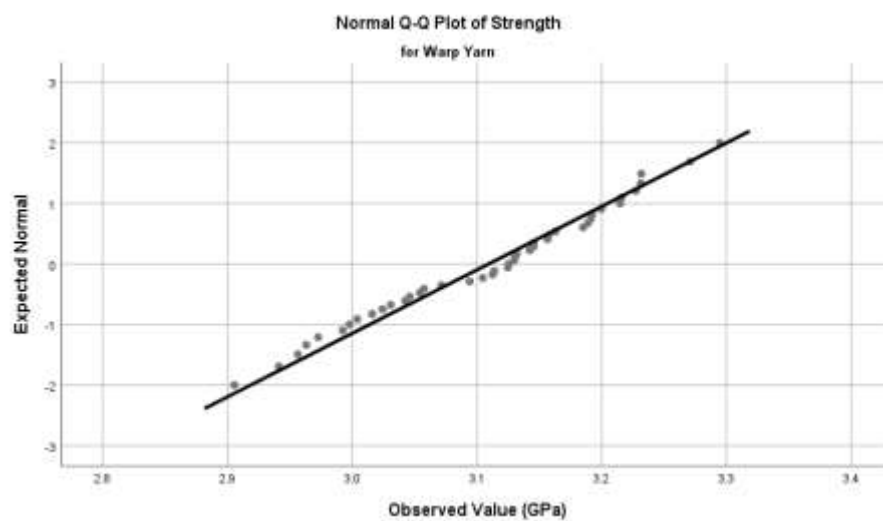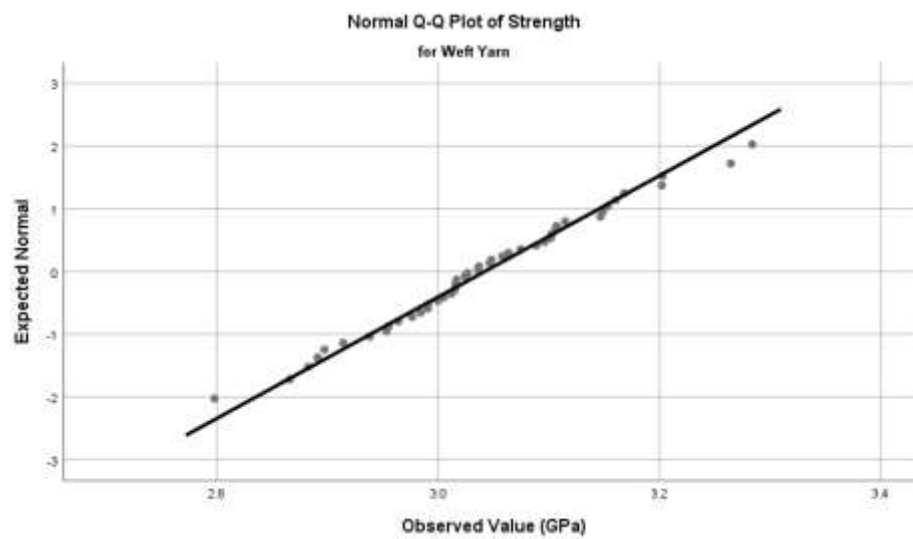

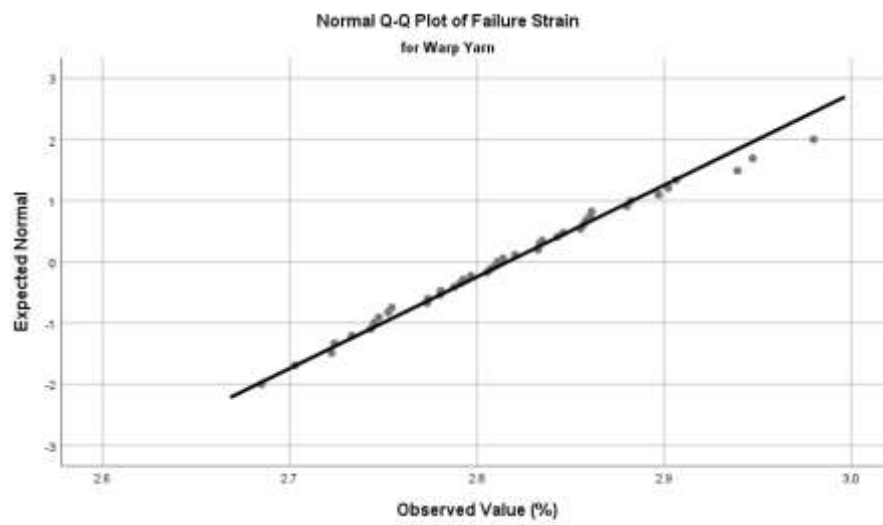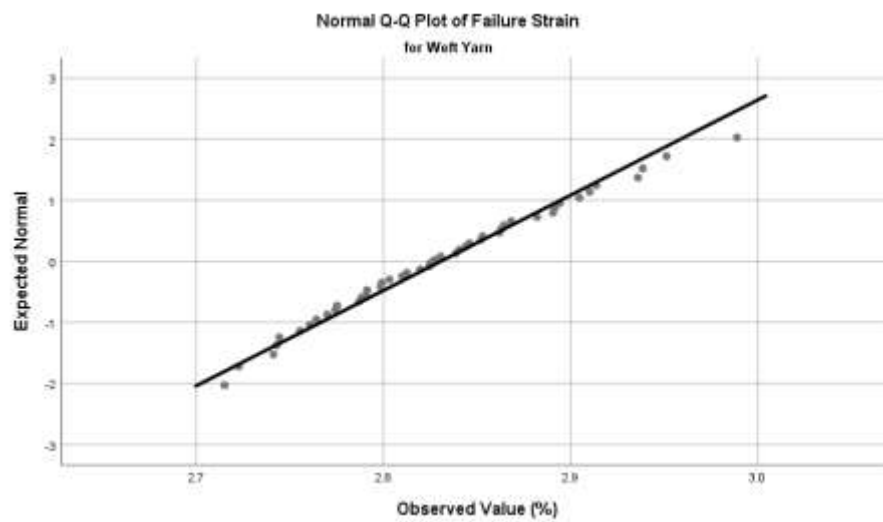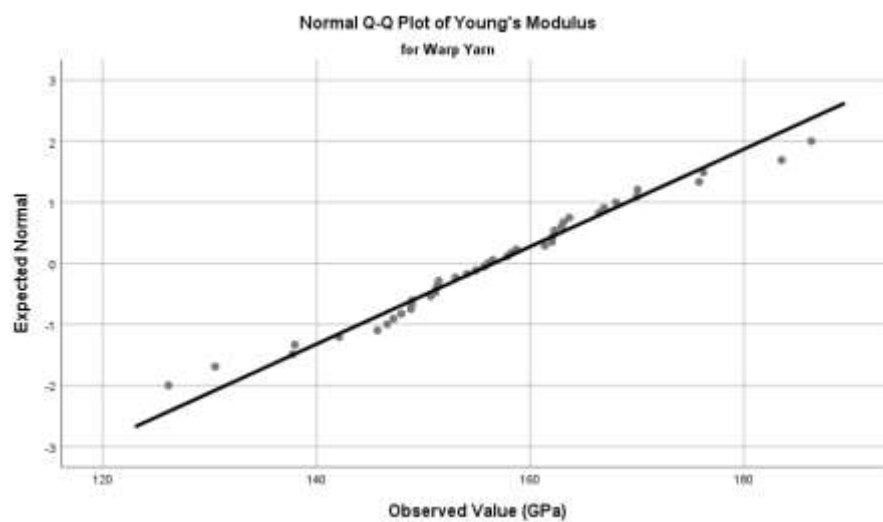

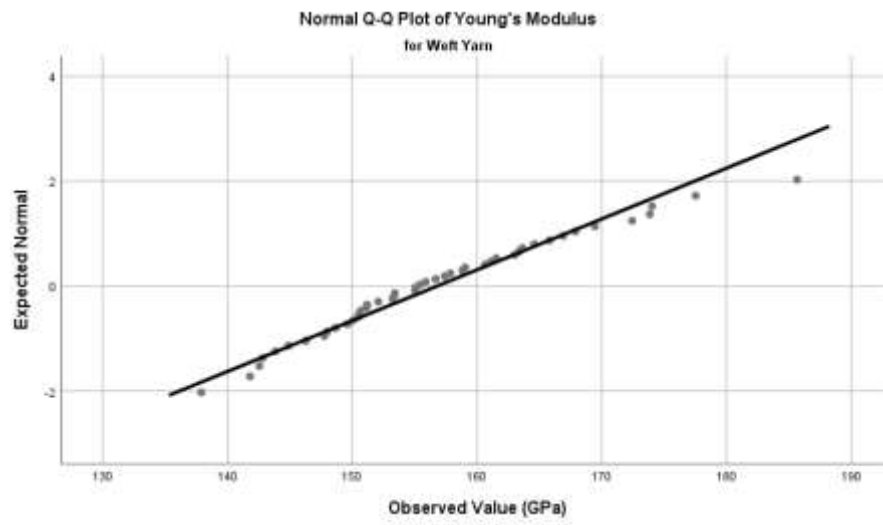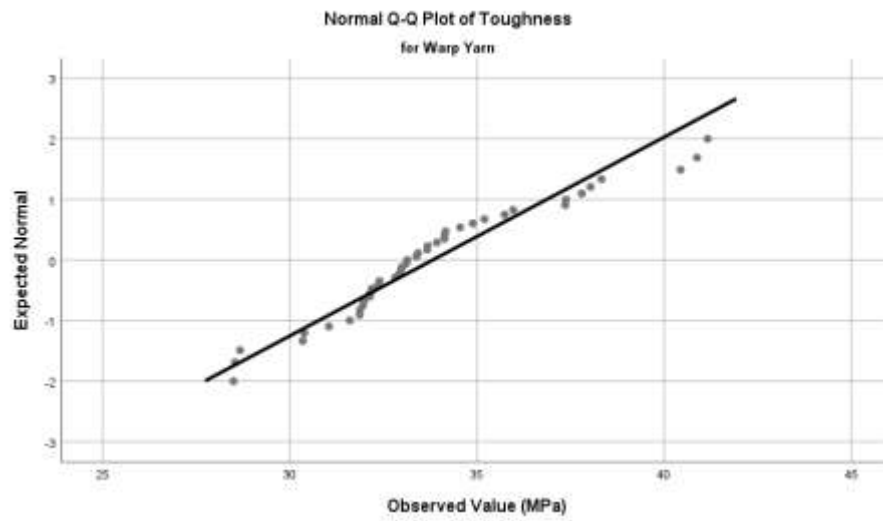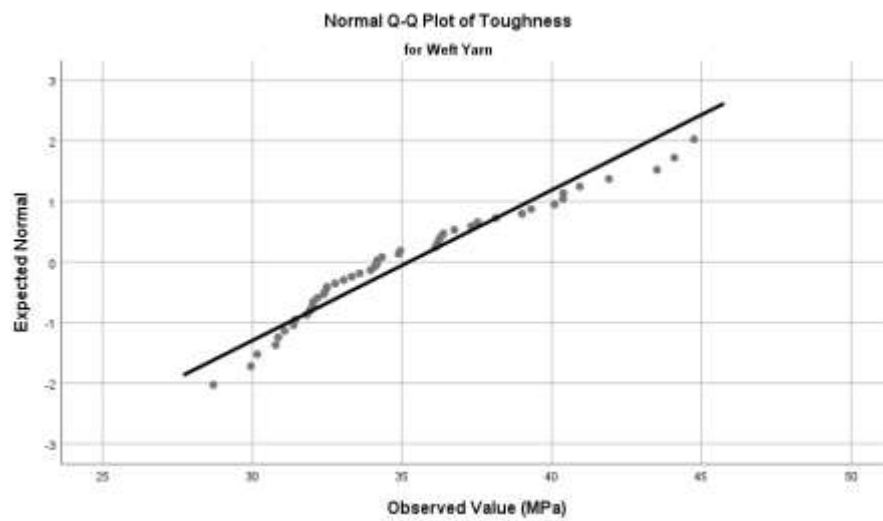

Supplement: Supplementary file 1 [file 18091022]
